# Supplementary material for: Pitfalls of Using NIR-Based Clinical Instruments to Test Eyes Implanted with Diffractive Intraocular Lenses
Source: MDPI journal article supplement (doi:10.3390/diagnostics13071259), 2023-03-27
Supplement: s1 [file s1]

## Supplementary Materials:

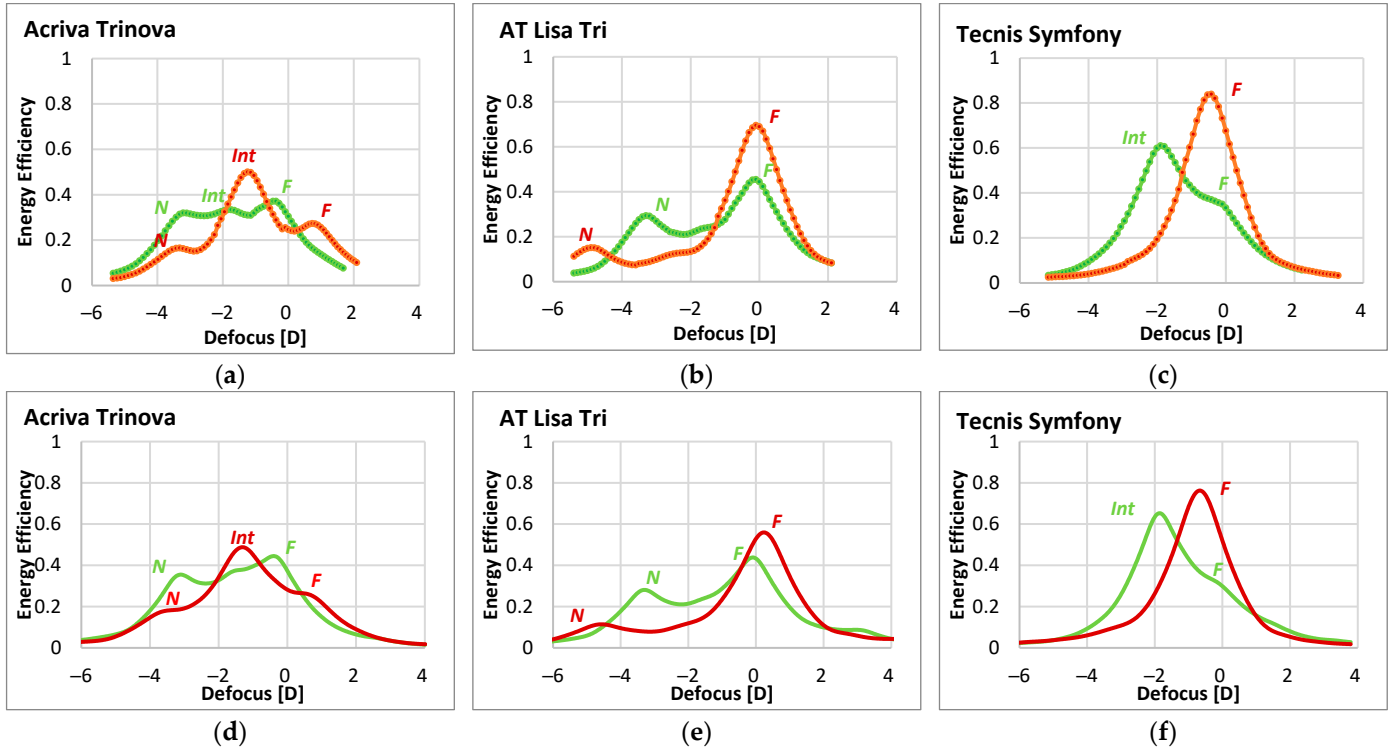

**Figure S1.** EE versus defocus (D) for the studied IOLs with 3.0mm IOL-pupil. Upper row (a), (b), (c): Experimental results (-●- green, -●- red NIR). Lower row (d), (e), (f): simulated results (green and red solid lines represent green and NIR illuminations, respectively). Far (F), intermediate (Int) and near (N) foci are labeled for each lens and illumination.

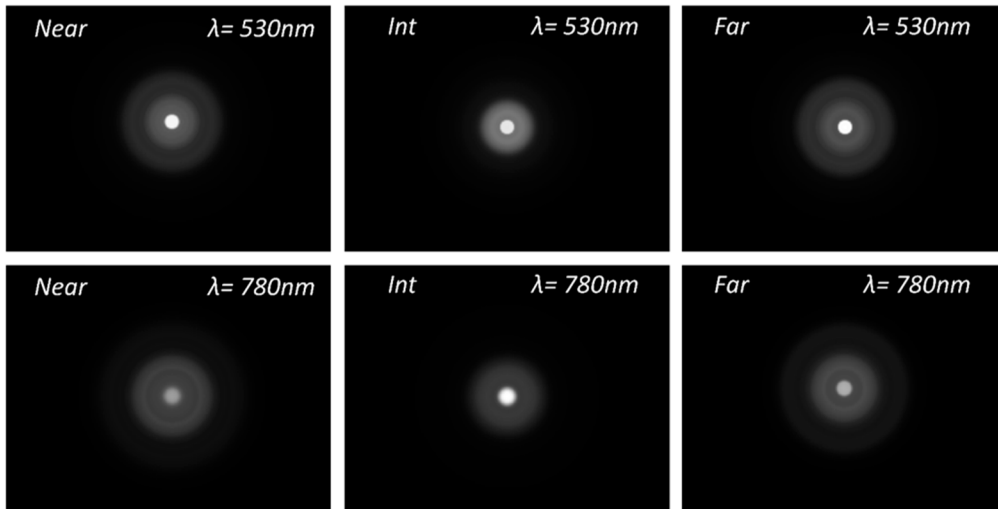

**Figure S2.** Simulated images of a pinhole test formed with Acriva Trinova IOL. Pupil 4.5mm. Gamma correction 0.45.

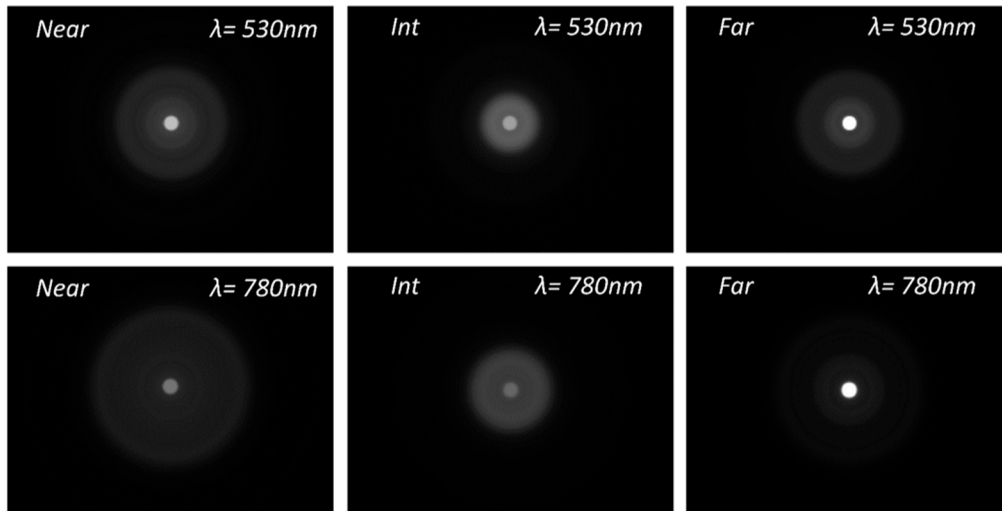

**Figure S3.** Simulated images of a pinhole test formed with AT Lisa Tri IOL. Pupil 4.5mm. Gamma correction 0.45.

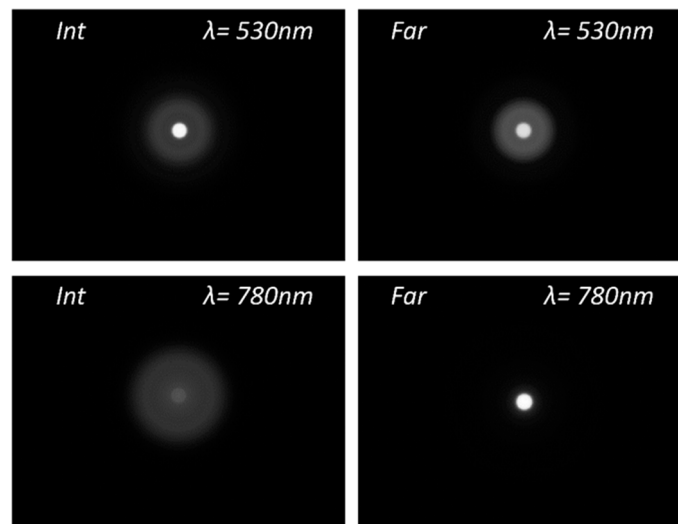

**Figure S4.** Simulated images of a pinhole test formed with Tecnis Symphony. Pupil 4.5mm. Gamma correction 0.45.
